# Supplementary material for: A default prior for regression coefficients
Source: Stat Methods Med Res. 2018 Dec 13;28(12):3799–807. doi: 10.1177/0962280218817792 (PMC6745606; doi:10.1177/0962280218817792)
Supplement: Supplemental Material2 - Supplemental material for A default prior for regression coefficients [file Supplemental_Material2.csv]

PMID	pvalue	n	remark
30087580	0.187	127
30087580	0.711	127
30087580	0.002	127
30087580	0.001	127
30087580	0.07	127
30087580	0.402	127
30088089	NA	NA	imprecise p values (p<0.01)
30088193	0.08	48
30088193	0.05	48
30088193	0.36	48
30088193	0.004	48
30088193	0.78	48
30088193	0.53	48
30088193	0.34	48
30088193	0.4	48
30088193	0.55	48
30088193	0.29	48
30088193	0.33	48
30088193	0.65	48
30088193	0.35	48
30088193	0.001	48
30088193	0.002	48
30088193	0.11	48
30088193	0.72	48
30088193	0.93	48
30088193	0.13	48
30088193	0.05	48
30089150	0.92	410
30089150	0.04	410
30089150	0.28	410
30089150	0.86	410
30089150	0.88	410
30089150	0.61	410
30089150	0.32	410
30089150	0.46	410
30089150	0.07	410
30089150	0.44	410
30089150	0.06	410
30089150	0.47	410
30089150	0.03	410
30089150	0.007	410
30089150	0.01	410
30089150	0.02	410
30089150	0.37	410
30089150	0.33	410
30089150	0.22	410
30089150	0.58	410
30089150	0.6	410
30089150	0.3	410
30089150	0.19	410
30089150	0.32	410
30089150	0.51	410
30089150	0.88	410
30089150	0.004	410
30089150	0.003	410
30089150	0.001	410
30089150	0.6	410
30089150	0.16	410
30089150	0.3	410
30089150	0.33	410
30089493	NA	NA	no uni- and multivariate analysis
30089584	0.029	949
30089985	NA	NA	full text not available
30090127	NA	NA	full text not available
30090732	NA	NA	logistic regression did not converge
30090830	NA	NA	imprecise p values (p<0.01)
30091528	0.693	2617
30091528	0.137	2617
30091528	0.406	2617
30091528	0.039	2617
30091528	0.848	2617
30091528	0.476	2617
30091528	0.034	2617
30091528	0.915	2617
30091528	0.517	2617
30091528	0.095	2617
30091528	0.218	2617
30091528	0.006	2617
30091528	0.542	2617
30091528	0.743	2617
30091528	0.713	2617
30091528	0.014	2617
30091528	0.314	2617
30091528	0.863	2617
30091528	0.281	2617
30091528	0.217	2617
30091528	0.031	2617
30091528	0.002	2617
30091528	0.151	2617
30091528	0.026	2617
30091528	0.174	2617
30092482	0.225	110
30092482	0.106	110
30092482	0.433	110
30092482	0.315	110
30092482	0.375	110
30092482	0.834	110
30092482	0.746	110
30092482	0.408	110
30092482	0.013	110
30092482	0.006	110
30092482	0.067	110
30092482	0.372	110
30092482	0.183	110
30092482	0.326	110
30092482	0.228	110
30092482	0.845	110
30092865	0.058	118
30092865	0.724	118
30092865	0.748	118
30092865	0.016	118
30094404	0.77	193
30094404	0.79	193
30094404	0.08	193
30094404	0.73	193
30094404	0.66	193
30094404	0.77	193
30094404	0.85	193
30094404	0.61	193
30094404	0.176	193
30094404	0.24	193
30094404	0.17	193
30094404	0.2	193
30094404	0.02	193
30094404	0.133	193
30094404	0.6	193
30094404	0.12	193
30094404	0.01	193
30094404	0.07	193
30094404	0.17	193
30094404	0.93	193
30094404	0.07	193
30094404	0.29	193
30094404	0.03	193
30094404	0.03	193
30095652	0.168	92
30095652	0.798	92
30095652	0.272	92
30095652	0.383	92
30095652	0.572	92
30095652	0.509	92
30095652	0.034	92
30095652	0.38	92
30095652	0.63	92
30095652	0.897	92
30095652	0.983	92
30095652	0.006	92
30095652	0.095	92
30095652	0.045	92
30095652	0.049	92
30095671	NA	NA	no p values
30096453	0.1	3022
30096453	0.89	3022
30096453	0.49	3022
30096453	0.64	3022
30096453	0.46	3022
30096453	0.69	3022
30096453	0.21	3022
30096453	0.46	3022
30096453	0.33	3022
30096453	0.03	3022
30096453	0.59	3022
30097966	NA	NA	no uni- and multivariate analysis
30098418	0.02	52
30098418	0.01	52
30098418	0.03	52
30099235	0.25	135
30099235	0.49	135
30099235	0.02	135
30099235	0.56	135
30099235	0.007	135
30099235	0.04	135
30099235	0.07	135
30099922	0.009	756
30099922	0.398	756
30099922	0.095	756
30099922	0.694	756
30099922	0.003	756
30099922	0.032	756
30099922	0.301	756
30099922	0.784	756
30099963	0.025	43
30099963	0.033	43
30099963	0.009	43
30099963	0.005	43
30099963	0.04	43
30100308	0.01	1364
30100757	NA	NA	no univariate regression coeffs
30100868	NA	NA	no uni- and multivariate analysis
30102498	NA	NA	full text not available
30102707	0.002	2702
30102707	0.003	2702
30102707	0.025	2702
30103059	0.6	58
30103059	0.6	58
30103059	0.761	58
30103059	0.71	58
30103059	0.866	58
30103059	0.6	58
30103059	0.6	58
30103059	0.906	58
30103059	0.858	58
30103059	0.685	58
30103059	0.697	58
30103059	0.946	58
30103059	0.565	58
30103059	0.66	58
30103059	0.003	58
30103707	0.001	361
30103707	0.002	361
30103707	0.03	361
30103707	0.278	361
30103707	0.695	361
30103707	0.076	361
30104727	NA	NA	no uni- and multivariate analysis
30105915	NA	NA	imprecise p values (<0.01)
30105947	0.948	88
30105947	0.203	88
30105947	0.622	88
30105947	0.908	88
30105947	0.954	88
30105947	0.929	88
30105947	0.47	88
30105947	0.111	88
30105947	0.86	88
30105947	0.047	88
30106066	NA	NA	full text not available
30106414	0.133	324
30106414	0.212	324
30106414	0.283	324
30106414	0.479	324
30106414	0.8	324
30108007	0.556	313
30108007	0.779	313
30108007	0.12	313
30108007	0.714	313
30108007	0.123	313
30108007	0.212	313
30108007	0.504	313
30108007	0.204	313
30108007	0.94	313
30108007	0.201	313
30108007	0.002	313
30108007	0.001	313
30108007	0.048	313
30108007	0.085	313
30108007	0.871	313
30108007	0.021	313
30108009	0.078	29
30108009	0.632	29
30108009	0.69	29
30108009	0.443	29
30108009	0.331	29
30108009	0.436	29
30108009	0.372	29
30108009	0.933	29
30108009	0.003	29
30108009	0.428	29
30108009	0.216	29
30109429	0.196	141
30109429	0.1	141
30109429	0.242	141
30109429	0.859	141
30109429	0.221	141
30109429	0.193	141
30109429	0.381	141
30109429	0.164	141
30109429	0.99	141
30109429	0.33	141
30110069	NA	NA	full text not available
30112854	0.005	1045
30112854	0.11	1045
30112854	0.08	1045
30112854	0.95	1045
30112854	0.3	1045
30112854	0.36	1045
30112854	0.03	1045
30112854	0.01	1045
30112854	0.02	1045
30112854	0.05	1045
30112854	0.11	1045
30112854	0.26	1045
30113998	0.313	146
30113998	0.01	146
30113998	0.063	146
30113998	0.008	146
30113998	0.391	146
30113998	0.037	146
30113999	0.245	225
30113999	0.801	225
30113999	0.376	225
30113999	0.158	225
30113999	0.341	225
30113999	0.271	225
30113999	0.008	225
30113999	0.081	225
30113999	0.019	225
30113999	0.011	225
30113999	0.261	225
30113999	0.873	225
30113999	0.022	225
30113999	0.345	225
30113999	0.805	225
30113999	0.31	225
30113999	0.691	225
30113999	0.898	225
30113999	0.001	225
30113999	0.389	225
30113999	0.143	225
30113999	0.347	225
30113999	0.25	225
30113999	0.799	225
30113999	0.46	225
30113999	0.696	225
30113999	0.498	225
30113999	0.251	225
30113999	0.488	225
30113999	0.545	225
30113999	0.941	225
30113999	0.447	225
30114580	NA	NA	no uni- and multivariate analysis
30114952	NA	NA	no univariate p values
30115010	NA	NA	imprecise p values (NS)
30115454	NA	NA	no univariate p values
30115519	0.028	642
30115519	0.358	642
30115519	0.48	642
30115519	0.375	642
30115519	0.011	642
30115519	0.002	642
30115519	0.78	642
30115519	0.19	642
30117790	0.008	102
30117790	0.804	102
30117790	0.173	102
30117790	0.915	102
30120041	NA	NA	no uni- and multivariate analysis
30120312	0.789	692
30120312	0.364	692
30120312	0.483	692
30120312	0.683	692
30120312	0.033	692
30120312	0.076	692
30120312	0.055	692
30120312	0.677	692
30120312	0.033	692
30120312	0.635	692
30120312	0.286	692
30120668	0.986	208
30120668	0.135	208
30120668	0.041	208
30120668	0.1	208
30120668	0.057	208
30120668	0.281	208
30120668	0.221	208
30120668	0.367	208
30120668	0.38	208
30120668	0.875	208
30120668	0.148	208
30120668	0.378	208
30120668	0.373	208
30120668	0.59	208
30120668	0.99	208
30120668	0.366	208
30120668	0.163	208
30120668	0.486	208
30120668	0.175	208
30120668	0.194	208
30120668	0.209	208
30120668	0.067	208
30120668	0.195	208
30120668	0.19	208
30120668	0.206	208
30120668	0.168	208
30120668	0.287	208
30120668	0.584	208
30120668	0.024	208
30120668	0.878	208
30120668	0.99	208
30120668	0.313	208
30120668	0.003	208
30120668	0.032	208
30120668	0.003	208
30120668	0.183	208
30120668	0.414	208
30121406	NA	NA	imprecise p values (p<0.05)
30121412	0.395	3182
30121412	0.295	3182
30121412	0.756	3182
30121412	0.246	3182
30121412	0.693	3182
30121412	0.055	3182
30121412	0.358	3182
30121412	0.11	3182
30121412	0.1	3182
30121412	0.065	3182
30121412	0.448	3182
30122138	0.009	105
30122138	0.999	105
30122138	0.838	105
30122138	0.729	105
30122138	0.117	105
30122138	0.635	105
30122138	0.328	105
30122138	0.371	105
30122138	0.728	105
30122138	0.626	105
30122138	0.42	105
30122138	0.629	105
30122138	0.338	105
30122138	0.198	105
30122138	0.687	105
30122138	0.391	105
30122138	0.999	105
30122138	0.638	105
30122138	0.391	105
30122138	0.999	105
30122138	0.208	105
30122138	0.765	105
30122138	0.999	105
30122138	0.714	105
30122138	0.209	105
30122138	0.009	105
30122138	0.095	105
30122138	0.79	105
30122138	0.116	105
30122193	NA	NA	unclear how variables for multivariate analysis were selected
30122881	0.068	370
30122881	0.396	370
30122881	0.615	370
30122881	0.184	370
30122881	0.365	370
30122881	0.846	370
30122881	0.306	370
30122881	0.542	370
30122881	0.082	370
30122947	0.753	380
30122947	0.005	380
30122947	0.005	380
30122947	0.001	380
30122947	0.001	380
30122947	0.008	380
30122947	0.217	380
30122947	0.048	380
30122947	0.031	380
30122947	0.005	380
30122947	0.855	380
30122990	0.128	277
30122990	0.042	277
30122990	0.271	277
30122990	0.308	277
30122990	0.035	277
30122990	0.019	277
30122990	0.018	277
30122990	0.003	277
30123180	0.294	42
30123180	0.455	42
30123180	0.15	42
30123180	0.919	42
30123180	0.95	42
30123180	0.031	42
30123180	0.003	42
30123180	0.893	42
30123180	0.778	42
30123180	0.997	42
30123180	0.791	42
30125306	0.224	603
30125306	0.488	603
30125306	0.714	603
30125306	0.788	603
30125306	0.566	603
30125306	0.613	603
30125306	0.981	603
30125306	0.008	603
30125306	0.021	603
30125306	0.004	603
30125306	0.962	603
30125306	0.096	603
30125306	0.238	603
30126030	NA	NA	full text not available
30127886	0.43	431
30127886	0.564	431
30127886	0.01	431
30127886	0.477	431
30127886	0.996	431
30127886	0.717	431
30127886	0.001	431
30127951	0.01	84
30127951	0.037	84
30127951	0.029	84
30127951	0.01	84
30127951	0.663	84
30127951	0.351	84
30127951	0.975	84
30127951	0.04	84
30127954	0.0019	1152
30127954	0.0123	1152
30127954	0.0693	1152
30127954	0.0523	1152
30127958	NA	NA	no suitable univariate p values
30127967	0.001	371
30127967	0.26	371
30127967	0.078	371
30127967	0.086	371
30127967	0.437	371
30127967	0.107	371
30127967	0.55	371
30127967	0.007	371
30127967	0.159	371
30127967	0.409	371
30127967	0.539	371
30127984	0.112	337
30127984	0.024	337
30127984	0.632	337
30127984	0.726	337
30128015	0.302	96
30128015	0.901	96
30128015	0.012	96
30128015	0.653	96
30128015	0.089	96
30128015	0.001	96
30128015	0.275	96
30128015	0.001	96
30128015	0.132	96
30128015	0.011	96
30128179	0.003	394
30128179	0.459	394
30128179	0.127	394
30128179	0.034	394
30128179	0.523	394
30128179	0.015	394
30128179	0.003	394
30128179	0.873	394
30128179	0.006	394
30128546	NA	NA	full text not available
30129480	NA	NA	full text not available
30130624	NA	NA	imprecise p values (p<0.01)
30131485	NA	NA	no univariate p values (in spanish)
30132067	0.4	113
30132067	0.002	113
30132067	0.3	113
30132067	0.3	113
30132067	0.6	113
30132067	0.4	113
30132067	0.017	113
30132067	0.006	113
30132067	0.002	113
30132067	0.07	113
30132067	0.4	113
30132067	0.3	113
30132107	0.379	506
30132107	0.008	506
30132107	0.029	506
30132107	0.735	506
30132566	NA	NA	full text not available
30132881	NA	NA	only sign univariate p values reported
30134357	0.1	37712
30134357	0.2	37712
30134357	0.51	37712
30134357	0.41	37712
30134357	0.07	37712
30134357	0.46	37712
30134357	0.29	37712
30134357	0.01	37712
30134357	0.72	37712
30136086	0.504	409
30136086	0.558	409
30136086	0.01	409
30136086	0.004	409
30136086	0.787	409
30136086	0.805	409
30136086	0.7	409
30136086	0.194	409
30136086	0.238	409
30138343	0.862	6780
30138343	0.004	6780
30138343	0.002	6780
30138343	0.001	6780
30138343	0.019	6780
30138343	0.038	6780
30138343	0.078	6780
30138343	0.006	6780
30138343	0.149	6780
30138343	0.273	6780
30138343	0.015	6780
30138343	0.153	6780
30138343	0.086	6780
30138343	0.055	6780
30138343	0.004	6780
30138343	0.002	6780
30138343	0.582	6780
30138343	0.64	6780
30138343	0.888	6780
30138343	0.355	6780
30138343	0.046	6780
30138343	0.013	6780
30138343	0.916	6780
30138343	0.475	6780
30138343	0.001	6780
30138343	0.01	6780
30138343	0.001	6780
30138594	0.149	42
30138594	0.458	42
30138594	0.23	42
30138594	0.023	42
30138594	0.04	42
